# Supplementary material for: Synthesis and optophysical properties of dimeric aza-BODIPY dyes with a push–pull benzodipyrrolidone core
Source: Royal Society of Chemistry journal article supplement (doi:10.1039/c4cc03759f), 2014-08-08
Supplement: c4cc03759f1.pdf [file c4cc03759f1.pdf]

## Supporting Information

### Synthesis and Optophysical Properties of Novel Dimeric Aza-BODIPY Dyes with a Push-Pull Benzodipyrrolidones Core

Yafei Wang,<sup>ab</sup> Long Chen,<sup>\*ac</sup> Reda M. El-shishtawy,<sup>d</sup> Saadullah G. Aziz<sup>d</sup> and Klaus Müllen<sup>\*a</sup>

<sup>a</sup>Max-Planck Institute for Polymer Research, Ackermannweg 10, 55124 Mainz, Germany

<sup>b</sup>Key Lab of Environment-Friendly Chemistry and Application of the Ministry of Education, College of Chemistry, Xiangtan University, Xiangtan 411105, China.

<sup>c</sup>Department of Chemistry, School of Science, Tianjin University, 300072, Tianjin, China.

<sup>d</sup>King Abdulaziz University, Faculty of Science, Chemistry Department, Jeddah 21589, Saudi Arabia

E-mail: chen@mpip-mainz.mpg.de; muellen@mpip-mainz.mpg.de

#### Contents:

*I. Experimental Section*

*II. Electrochemical properties and DFT data*

*III. X-ray crystal structures of **9***

*IV. Computational HOMO and LUMO distributions of aza-BODIPYs **7-10***

*V. Calculated UV/Vis absorption spectra of **7-10***

*VI. CV curves*

*VII. X-ray crystal structures and details*

## I. Experimental Section

### *General methods:*

$^1\text{H}$  and  $^{13}\text{C}$  NMR spectra were recorded on a Bruker Avance 250 Spectrometer. Mass spectra were recorded with a Finnigan MAT and VG Instruments ZAB 2-SE-FPD. UV/Vis spectra were recorded at room temperature on a Perkin-Elmer Lambda 900 spectrometer with dichloromethane as solvent. The redox properties of compounds **7-10** were measured with cyclic voltammetry (CV,  $[\text{Bu}_4\text{NPF}_6] = 0.1 \text{ M}$ ,  $100 \text{ mVs}^{-1}$ ) in deoxygenated THF solution at room temperature using a three-electrode electrochemical cell with  $\text{Bu}_4\text{NPF}_6$  (0.1 M). Cyclic voltammetry for electrochemistry experiments was carried out with an EG&G Princeton Applied Research potentiostat, model 273. The working electrode consisted of a platinum disk (1.5 mm diameter). A platinum wire was used as the counter electrode and an Ag wire was used as the reference electrode internally calibrated with ferrocene/ferrocenium ( $\text{Fc}/\text{Fc}^+$ ) in the measurement. Compound **3a**, **3b** and **4** were reported by the literature.<sup>1,2</sup> Crystal-structure determinations were carried out on a Nonius KCCD diffractometer with graphite monochromated Mo K radiation. The structures were solved by direct methods (SHELXS-97). Melting points were determined on a Büchi Melting Point B-545 apparatus.

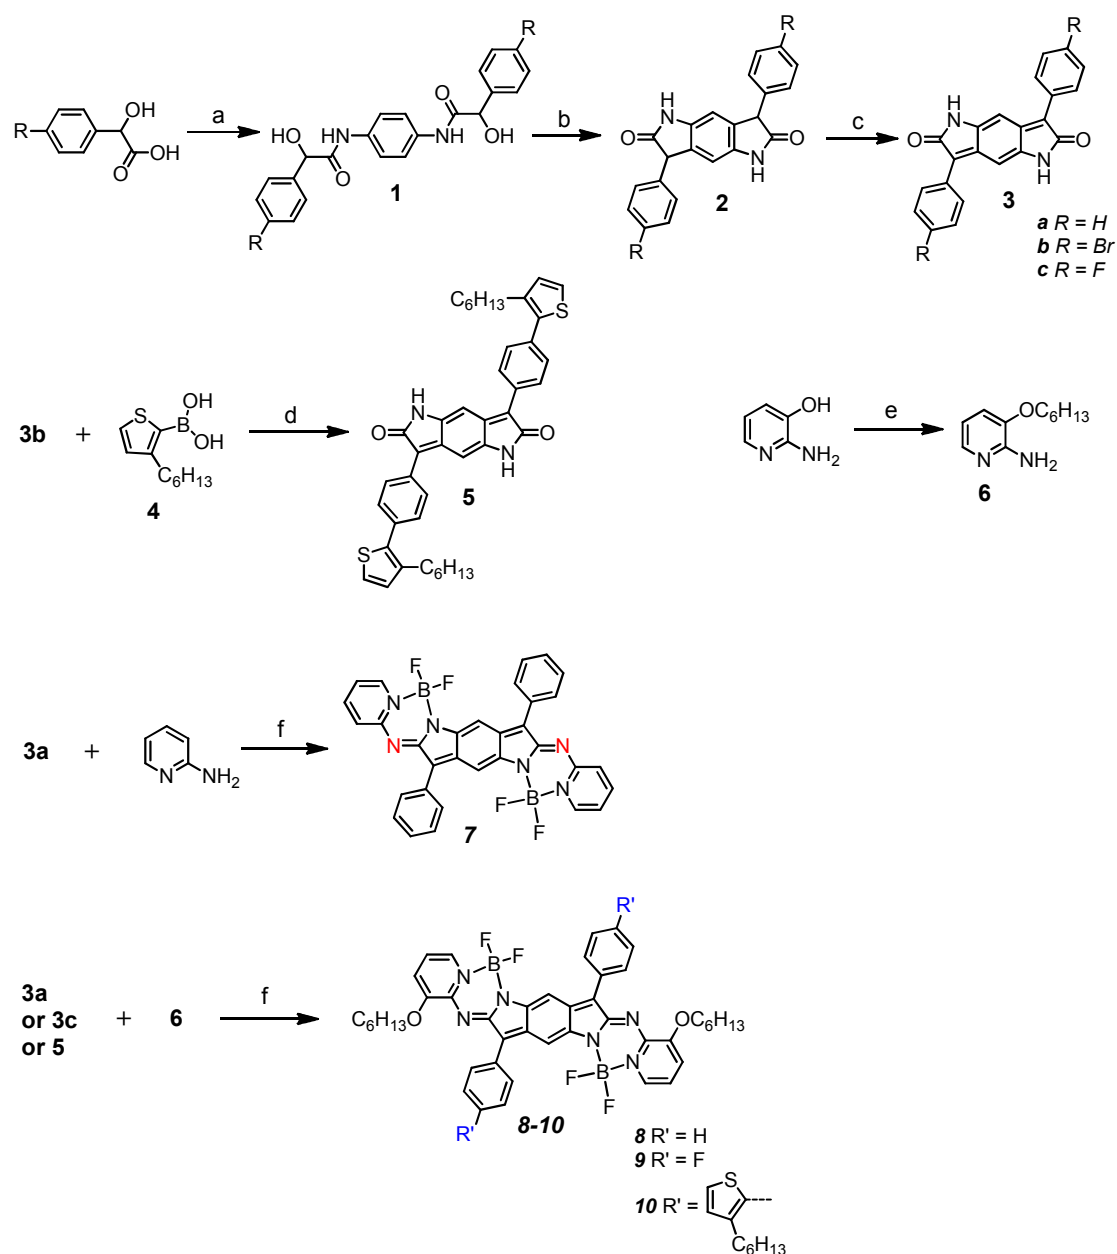

**Scheme S1.** Synthetic route of *aza*-BODIPY dyes **7-10**. a) benzene-1,4-diamine, chlorobenzene, 130°C, 20 h; b) H<sub>2</sub>SO<sub>4</sub>, rt., 24 h; c) NaOH, K<sub>2</sub>S<sub>2</sub>O<sub>8</sub>/H<sub>2</sub>O, ethanol, 90°C, 2 h; d) Pd(PPh<sub>3</sub>)<sub>4</sub>, 2 M K<sub>2</sub>CO<sub>3</sub>, THF, reflux, 6 h; e) 1-bromohexane, NaH, DMF, rt., 24 h; f) i. TiCl<sub>4</sub>, Et<sub>3</sub>N, Toluene, reflux, 12 h; ii. BF<sub>3</sub>•Et<sub>2</sub>O, reflux, 4h.

### Compound 1c

A mixture of *p*-fluoromandelic acid (2.50 g, 14.69 mmol) and *p*-phenylenediamine (0.53 g, 4.90 mmol) in chlorobenzene was heated to 130 °C for 20 h. The precipitate was filtered, washed with ethanol and dried in vacuo to get compound **1c** as a grey solid (1.60 g. Yield, 79%). <sup>1</sup>H NMR (*d*-DMSO, 250 MHz, 298K): δ = 9.89 (s, 2H), 7.60 (s, 4H), 7.57 (m, 4H), 7.22 (t, 4H), 6.48 (d, J = 5.0 Hz, 2H), 5.10 (d, J = 5.0 Hz, 2H). <sup>13</sup>C NMR (*d*-DMSO, 62.5 MHz, 298K): δ = 170.7, 163.54, 159.67, 137.09, 134.15, 128.53, 128.4, 119.92, 114.99, 114.65, 73.16.

### Compound 2c

Compound **1c** (1.40 g, 3.39 mmol) was added to sulfuric acid (25 mL) and stirred for 24 h at room. Then, the mixture was poured into ice water. The precipitate was filtered, washed with water and dried to get compound **2** as a grey solid (1.20 g. Yield, 94%). <sup>1</sup>H NMR (*d*-DMSO, 250 MHz, 298K): δ = 10.37 (s, 2H), 7.23 (m, 8H), 6.99 (s, 2H), 7.81(d, J = 5.0 Hz, 2H). <sup>13</sup>C NMR (*d*-DMSO, 62.5 MHz, 298K): δ = 176.61, 163.25, 159.39, 137.18, 133.81, 130.17, 129.52, 115.68, 115.34, 106.88, 51.31.

### Compound 3c

Sodium hydroxide solution (5 M, 0.50 mL) was dropwised to a suspension of compound **2** (1.20 g, 3.19 mmol) in ethanol. Then potassium persulfate (0.86 g, 3.2 mmol) in water (3 mL) was added. The mixture was heated at reflux for 2 h. The precipitate was filtered, washed with water and ethanol, dried to yield compound **3** as a red solid (0.83 g. Yield, 70%). <sup>1</sup>H NMR (*d*-DMSO, 250 MHz, 298K): δ = 10.33 (s, 2H), 7.75 (m, 4H), 7.40 (t, 4H), 6.36 (s, 2H). <sup>13</sup>C NMR (*d*-DMSO, 62.5 MHz, 298K): δ = 170.34, 164.20, 160.26, 142.66, 134.64, 131.57, 127.33, 125.72, 115.95, 115.61, 97.62.

### Compound 5

In 100 mL two-neck round bottle flask, a mixture of compound **3b** (0.40 g, 0.81mmol), compound **4** (0.52 g, 1.77 mmol), Pd(PPh<sub>3</sub>)<sub>4</sub> (46.6 mg, 0.04 mmol) and 2 M K<sub>2</sub>CO<sub>3</sub> (10 mL) was refluxed in THF for 6 h under argon. The reaction mixture was poured into water and extracted with dichloromethane. After removed the solvent, the crude product was washed with a lot of methanol and a red solid was achieved. The compound was used to the next step without further purification.

### Compound 6

A mixture of 2-aminopyridin-3-ol (5.0 g, 45.50 mmol) and NaH (1.50 g, 68.20 mmol) was stirred in DMF at room temperature for 1 h under Ar. Then a solution of 1-bromohexane (8.95 g, 54.60 mmol) in DMF was added and the reaction mixture was stirred for 24 h at room temperature. The reaction mixture was poured into water and extracted with chloroform. The crude product was purified by flash chromatography (petroleum ether/ethyl acetate, 4:1) to afford grey white solid (4.0 g, 46%). <sup>1</sup>H NMR (CDCl<sub>3</sub>, 250 MHz, 298K): δ = 7.64 (d, J = 6.5 Hz, 1H), 6.9 (d, J = 7.5 Hz, 1H), 6.62 (m, 1H), 4.74 (s, 2H), 3.99 (t, 2H), 1.86 (m, 2H), 1.49 (m, 6H), 0.93 (t, 3H). <sup>13</sup>C NMR (CDCl<sub>3</sub>, 62.5 MHz, 298K): δ = 150.10, 141.91, 137.99, 116.02, 113.63, 68.15, 31.55, 29.07, 25.76, 22.59, 14.04.

## Compound 7-10

### General synthetic procedure:

1 equiv of compound **3** (or **5**) and 10 equiv of compound **6** (or pyridin-2-amine) were refluxed in a dry toluene under Ar. To the solution, 15 equiv of titanium tetrachloride and 40 equiv of triethylamine were added and the reaction mixture was refluxed overnight. Then 30 equiv of borontrifluoride etherate was added, and the reaction mixture was refluxed for 4 h. Then the solution was poured into water, and the organic phase was extracted with chloroform. The organic layer was dried over sodium sulfate and the solvent was removed. The crude product was purified by flash chromatography with dichloromethane.

**7**, Yield: 10.3 %. Melting point: > 380 °C. <sup>1</sup>H NMR (CD<sub>2</sub>Cl<sub>2</sub>, 250 MHz, 298K): δ = 8.37 (d, J = 5 Hz, 5H), 8.04 (m, 10H), 7.20 (t, 5 H). <sup>13</sup>C NMR (CD<sub>2</sub>Cl<sub>2</sub>, 62.5 MHz, 298K): δ = 157.65, 154.54, 152.93, 142.86, 141.51, 140.01, 136.23, 119.39, 116.80, 106.30, 102.21. MALDI-TOF-MS (m/z): 587.07.

**8**, Yield: 5.2 %. Melting point: > 380 °C. <sup>1</sup>H NMR (CD<sub>2</sub>Cl<sub>2</sub>, 250 MHz, 298K): δ = 8.0 (d, J = 7.5 Hz, 6H), 7.61 (m, 6H), 7.43 (t, 2 H), 7.27 (t, 2H), 7.1 (s, 2H), 4.19 (t, 4H), 1.96 (m, 4H), 1.44 (m, 12H), 1.0 (m, 6H). <sup>13</sup>C NMR (CD<sub>2</sub>Cl<sub>2</sub>, 62.5 MHz, 298K): δ = 147.92, 145.86, 136.41, 131.77, 130.98, 130.08, 129.52, 128.87, 121.90, 119.65, 105.02, 70.25, 31.95, 29.30, 26.02, 23.08, 14.29. MALDI-TOF-MS (m/z): 788.48.

**9**, Yield: 6.7 %. Melting point: > 380 °C. <sup>1</sup>H NMR (CD<sub>2</sub>Cl<sub>2</sub>, 250 MHz, 298K): δ = 8.04 (m, 6H), 7.43 (d, J = 7.5 Hz, 4H), 7.31 (m, 6 H), 7.06 (s, 2H), 4.17 (t, 4H), 1.97 (m, 4H), 1.47 (m, 12H), 1.0 (t, 6H). <sup>13</sup>C NMR (CD<sub>2</sub>Cl<sub>2</sub>, 62.5 MHz, 298K): δ = 161.82, 157.21, 151.54, 145.78, 138.60, 132.97., 132.44, 130.07, 119.78., 116.57, 116.13, 115.79, 110.02, 104.76, 70.21, 31.93, 29.31, 26.03, 23.08, 14.24. MALDI-TOF-MS (m/z): 824.42.

**10**, Yield: 7.5 %. Melting point: 328-330 °C. <sup>1</sup>H NMR (CD<sub>2</sub>Cl<sub>2</sub>, 250 MHz, 298K): δ = 8.10 (d, J = 7.5 Hz, 4H), 8.01 (d, J = 5.0 Hz, 2H), 7.67 (d, J = 7.5 Hz, 4H), 7.44 (d, J = 10.0 Hz, 2 H), 7.37 (d, J = 5.0 Hz, 2H), 7.28 (t, 2H), 7.18 (s, 2H), 7.11 (d, J = 5.0 Hz, 2H) 4.19 (t, 4H), 2.86 (t, 4H), 1.99 (m, 4H), 1.76 (m, 6H), 1.62 (m, 22H), 0.96 (m, 12). <sup>13</sup>C NMR (CD<sub>2</sub>Cl<sub>2</sub>, 62.5 MHz, 298K): δ = 162.03, 152.09, 150.75, 150.16, 149.47, 147.86, 145.86, 139.90, 137.63, 136.19, 134.22, 131.10, 130.81, 130.25, 130.07, 129.61, 125.65, 124.68, 121.82, 119.68, 105.11, 70.19, 32.15, 31.94, 31.47, 29.69, 29.29, 26.07, 23.14, 23.05, 14.24. MALDI-TOF-MS (m/z): 1120.85.

## References

1. W. Cui, J. Yuen and F. Wudl, *Macromolecules*, 2011, **44**, 7869.
2. H. Pan, Y. Li, Y. Wu, P. Liu, B. S. Ong, S. Zhu, and G. Xu, *J. Am. Chem. Soc.*, 2007, **129**, 4112.

**Table S1.** Electrochemical properties and DFT results of *aza*-BODIPY **7-10**

| Compound  | <sup>a</sup> <i>E</i> <sub>ox1</sub><br>V | <sup>a</sup> <i>E</i> <sub>red1</sub><br>V | <sup>a</sup> <i>HOMO</i><br>eV | <sup>a</sup> <i>LUMO</i><br>eV | <sup>b</sup> <i>E</i> <sub>g</sub> <sup>opt</sup><br>eV | <sup>c</sup> <i>HOMO</i><br>eV | <sup>c</sup> <i>LUMO</i><br>eV | <sup>c</sup> <i>E</i> <sub>g</sub> <sup>cal</sup><br>eV |
|-----------|-------------------------------------------|--------------------------------------------|--------------------------------|--------------------------------|---------------------------------------------------------|--------------------------------|--------------------------------|---------------------------------------------------------|
| <b>7</b>  | 0.63                                      | -0.80                                      | -5.43                          | -4.00                          | 1.97                                                    | -5.639                         | -3.553                         | 2.086                                                   |
| <b>8</b>  | 0.60                                      | -0.70                                      | -5.40                          | -4.10                          | 1.79                                                    | -5.365                         | -3.381                         | 1.984                                                   |
| <b>9</b>  | 0.60                                      | -0.67                                      | -5.40                          | -4.13                          | 1.72                                                    | -5.489                         | -3.508                         | 1.981                                                   |
| <b>10</b> | 0.52                                      | -0.68                                      | -5.32                          | -4.12                          | 1.68                                                    | -5.357                         | -3.428                         | 1.929                                                   |

<sup>a</sup> electrochemical data was determined by cyclic voltammetric measurement in 0.1 M solution of Bu<sub>4</sub>NPF<sub>6</sub> in THF: vs Fc/Fc<sup>+</sup>. Estimated vs vacuum level from *E*<sub>HOMO</sub> = -4.80 eV + *E*<sub>ox1</sub>; *E*<sub>LUMO</sub> = -4.80 eV - *E*<sub>red1</sub>.

<sup>b</sup> the optical bandgap( *E*<sub>g</sub><sup>opt</sup> = 1240/λ<sub>onset</sub>) was evaluated via absorption onset.

<sup>c</sup> the data were obtained from theory calculation based on DFT calculation at the B3LYP/6-31G(d) level.

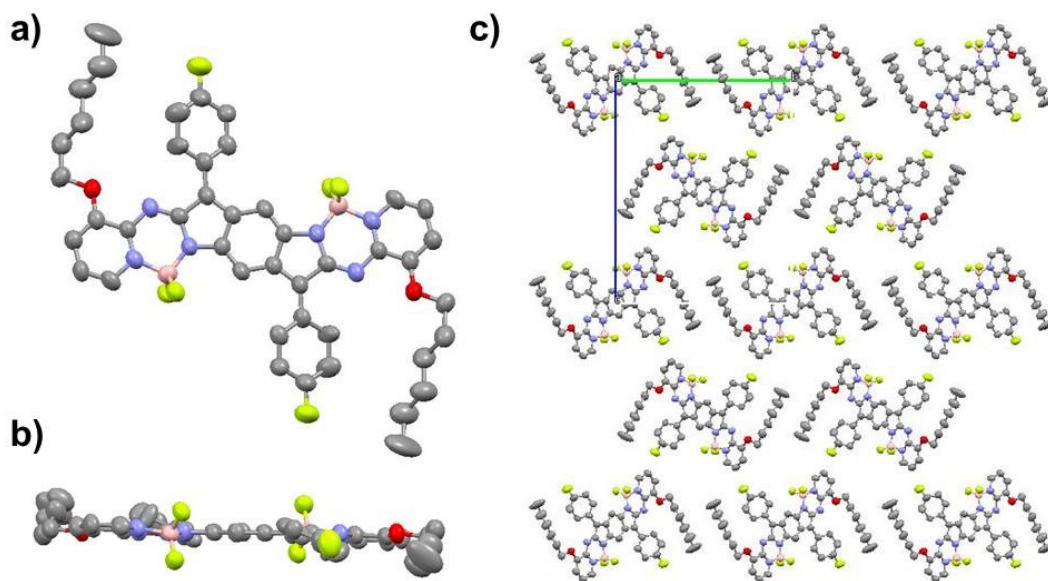

**Figure S1.** X-ray crystal structures of **9** (a: top view, b: side view). Displacement ellipsoids are drawn at the 50% probability level, and H atoms are omitted for clarity; c: Packing view down the *a* direction. C, gray; O, red; N, blue; B, pink; F, green.

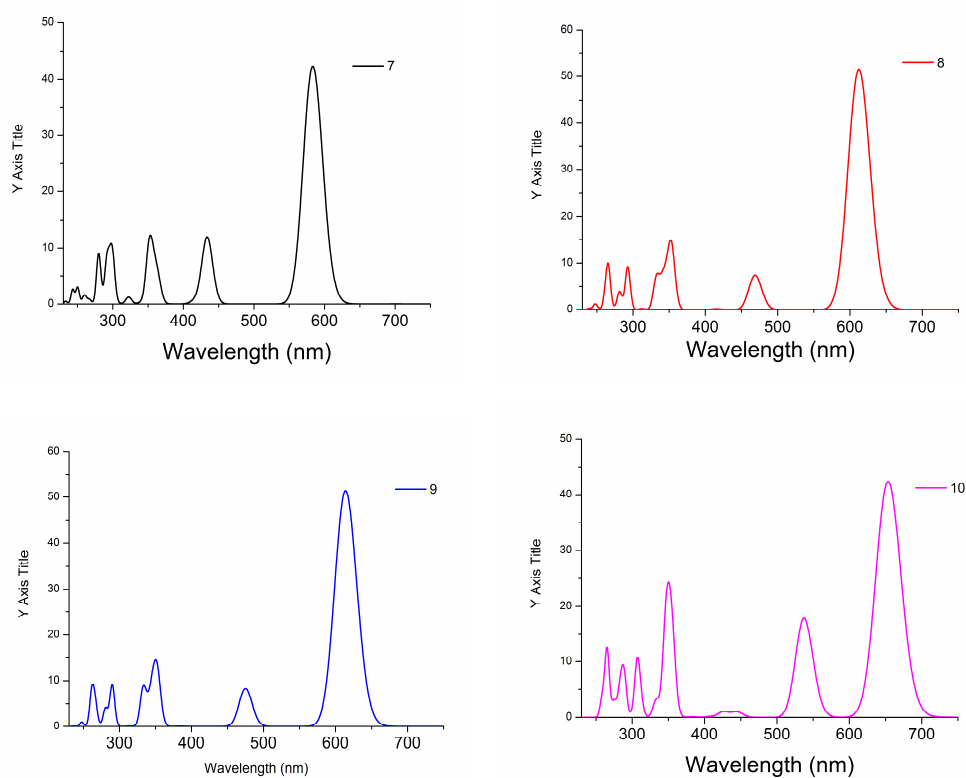

**Figure S2.** The UV/Vis absorption spectra of **7-10** calculated by B3LYP/6-31G(d) level of theory.

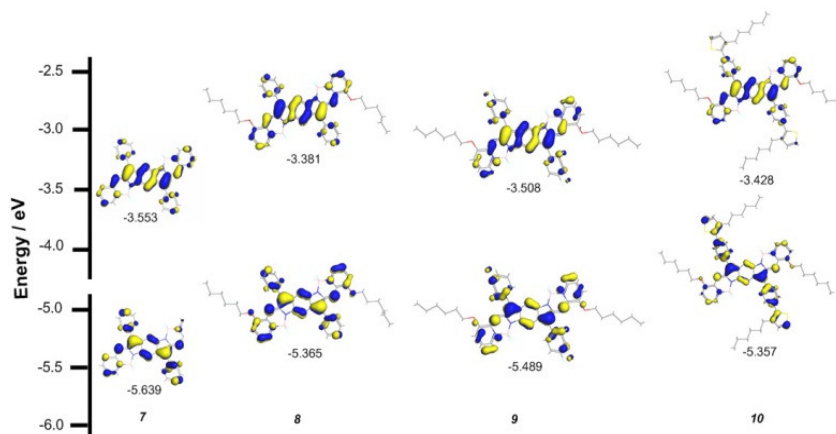

**Fig. S3** HOMO and LUMO distributions of *aza*-BODIPYs **7-10** calculated at the B3LYP/6-31G (d) level.

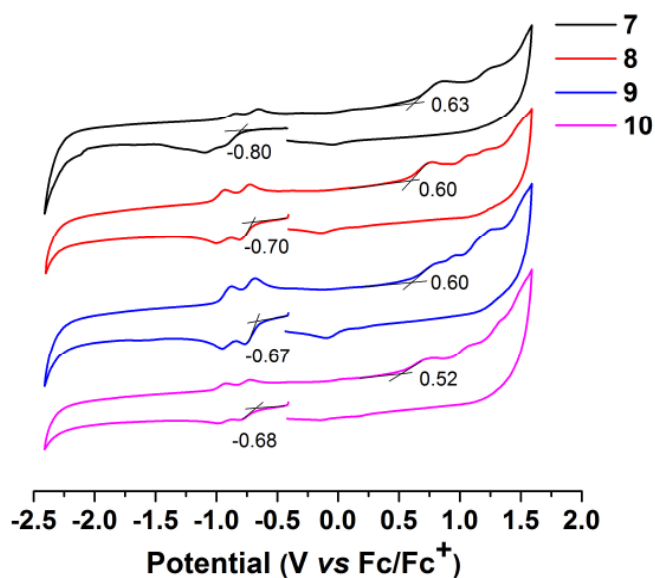

**Figure S4.** Cyclic voltammograms curves of *aza*-BODIPYs **7-10** in THF ( $10^{-3}$  mol L $^{-1}$ ); scan rate 100 mVs $^{-1}$ , vs Fc/Fc $^{+}$ .



### Crystal data for *aza*-BODIPY 8

|                          |                                                                                             |
|--------------------------|---------------------------------------------------------------------------------------------|
| formula                  | C <sub>44</sub> H <sub>44</sub> B <sub>2</sub> F <sub>4</sub> N <sub>6</sub> O <sub>2</sub> |
| molecular weight         | 786.5 gmol <sup>-1</sup>                                                                    |
| absorption               | $\mu = 0.1 \text{ mm}^{-1}$                                                                 |
| crystal size             | 0.18 x 0.3 x 0.8 mm <sup>3</sup> brown block                                                |
| space group              | P -1 (triclinic)                                                                            |
| lattice parameters       | a = 11.4702(6)Å $\alpha = 113.625(4)^\circ$                                                 |
| (calculate from          | b = 13.1470(6)Å $\beta = 95.348(4)^\circ$                                                   |
| 18532 reflections with   | c = 14.9642(8)Å $\gamma = 105.167(4)^\circ$                                                 |
| 2.6° < $\theta$ < 28.4°) | V = 1944.8(2)Å <sup>3</sup> z = 2      F(000) = 824                                         |
| temperature              | -80°C                                                                                       |
| density                  | d <sub>xray</sub> = 1.343 gcm <sup>-3</sup>                                                 |

#### data collection

|                        |                                                                     |
|------------------------|---------------------------------------------------------------------|
| diffractometer         | STOE IPDS 2T                                                        |
| radiation              | Mo-K $\alpha$ Graphitmonochromator                                  |
| Scan – type            | $\omega$ scans                                                      |
| Scan – width           | 1°                                                                  |
| scan range             | 2° ≤ $\theta$ < 28°<br>-15 ≤ h ≤ 15    -17 ≤ k ≤ 17    -16 ≤ l ≤ 19 |
| number of reflections: |                                                                     |
| measured               | 19662                                                               |
| unique                 | 9507 (R <sub>int</sub> = 0.0946)                                    |
| observed               | 5494 ( I /σ(F) > 4.0)                                               |

#### daten correction, structure solution and refinement

|                                                |                                                                                                                                                                                                                                                                                                            |
|------------------------------------------------|------------------------------------------------------------------------------------------------------------------------------------------------------------------------------------------------------------------------------------------------------------------------------------------------------------|
| corrections                                    | Lorentz and polarisation correction.                                                                                                                                                                                                                                                                       |
| Structure solution                             | Program: SIR-97 (Direct methods)                                                                                                                                                                                                                                                                           |
| refinement                                     | Program: SHELXL-97 (full matrix). 525 refined parameters, weighting scheme:<br>$w = 1/[\sigma^2(F_o^2) + (0.103 * P)^2 + *P]$<br>with $(\text{Max}(F_o^2, 0) + 2 * F_c^2) / 3$ . H-atoms at calculated positions and refined with isotropic displacement parameters, non H- atoms refined anisotropically. |
| R-values                                       | wR2 = 0.1794    (R1 = 0.0603 for observed reflections, 0.1031 for all reflections)                                                                                                                                                                                                                         |
| goodness of fit                                | S = 0.909                                                                                                                                                                                                                                                                                                  |
| maximum deviation of parameters                | 0.001 * e.s.d                                                                                                                                                                                                                                                                                              |
| maximum peak height in diff. Fourier synthesis | 0.36, -0.29 eÅ <sup>-3</sup>                                                                                                                                                                                                                                                                               |

Final coordinates and equivalent displacement parameters ( $\text{\AA}^2$ )

$$U_{\text{eq}} = (1/3) * \sum_{ij} a_i^* a_j^* \mathbf{a}_i \mathbf{a}_j$$

| Atom | X         | Y          | Z         | $U_{\text{eq}}$ |
|------|-----------|------------|-----------|-----------------|
| C1   | 0.4299(2) | 0.6121(2)  | 0.6548(2) | 0.0321(8)       |
| C2   | 0.4927(2) | 0.5338(2)  | 0.6284(2) | 0.0297(8)       |
| N3   | 0.4433(2) | 0.4125(1)  | 0.5710(1) | 0.0315(7)       |
| B4   | 0.3086(2) | 0.3362(2)  | 0.5439(2) | 0.0331(10)      |
| N5   | 0.3067(2) | 0.2065(2)  | 0.4755(1) | 0.0348(7)       |
| C6   | 0.1944(2) | 0.1239(2)  | 0.4269(2) | 0.044(1)        |
| C7   | 0.1827(2) | 0.0102(2)  | 0.3685(2) | 0.050(1)        |
| C8   | 0.2883(2) | -0.0238(2) | 0.3567(2) | 0.0440(10)      |
| C9   | 0.4026(2) | 0.0592(2)  | 0.4067(2) | 0.0359(9)       |
| C10  | 0.4120(2) | 0.1782(2)  | 0.4673(2) | 0.0321(8)       |
| N11  | 0.5274(2) | 0.2570(2)  | 0.5150(1) | 0.0314(7)       |
| C12  | 0.5384(2) | 0.3680(2)  | 0.5641(2) | 0.0300(8)       |
| C13  | 0.6568(2) | 0.4635(2)  | 0.6190(2) | 0.0300(8)       |
| C14  | 0.6264(2) | 0.5655(2)  | 0.6590(2) | 0.0305(8)       |
| C15  | 0.6971(2) | 0.6853(2)  | 0.7253(2) | 0.0325(8)       |
| C16  | 0.6337(2) | 0.7629(2)  | 0.7530(2) | 0.0312(8)       |
| N17  | 0.6803(2) | 0.8824(2)  | 0.8205(1) | 0.0332(7)       |
| B18  | 0.8092(2) | 0.9506(2)  | 0.8845(2) | 0.039(1)        |
| N19  | 0.8087(2) | 1.0794(2)  | 0.9501(1) | 0.0350(7)       |
| C20  | 0.9187(2) | 1.1581(2)  | 1.0107(2) | 0.0412(10)      |
| C21  | 0.9278(2) | 1.2696(2)  | 1.0756(2) | 0.045(1)        |
| C22  | 0.8225(2) | 1.3034(2)  | 1.0803(2) | 0.0419(10)      |
| C23  | 0.7106(2) | 1.2243(2)  | 1.0195(2) | 0.0367(9)       |
| C24  | 0.7033(2) | 1.1087(2)  | 0.9502(2) | 0.0334(8)       |
| N25  | 0.5910(2) | 1.0331(2)  | 0.8898(1) | 0.0337(7)       |
| C26  | 0.5839(2) | 0.9254(2)  | 0.8302(2) | 0.0323(8)       |
| C27  | 0.4688(2) | 0.8318(2)  | 0.7632(2) | 0.0308(8)       |
| F28  | 0.2677(1) | 0.3368(1)  | 0.6286(1) | 0.0430(6)       |
| F29  | 0.2306(1) | 0.3666(1)  | 0.4920(1) | 0.0421(6)       |
| O30  | 0.5128(2) | 0.0411(1)  | 0.4050(1) | 0.0402(7)       |
| C31  | 0.5147(2) | -0.0730(2) | 0.3374(2) | 0.0399(9)       |
| C32  | 0.6483(2) | -0.0663(2) | 0.3447(2) | 0.0381(9)       |
| C33  | 0.6632(2) | -0.1740(2) | 0.2619(2) | 0.046(1)        |
| C34  | 0.7963(2) | -0.1692(2) | 0.2621(2) | 0.045(1)        |
| C35  | 0.8056(3) | -0.2723(3) | 0.1719(3) | 0.074(2)        |
| C36  | 0.9344(3) | -0.2719(3) | 0.1628(2) | 0.066(1)        |
| C37  | 0.7778(2) | 0.4458(2)  | 0.6269(2) | 0.0318(8)       |
| C38  | 0.7865(2) | 0.3372(2)  | 0.6161(2) | 0.0361(9)       |
| C39  | 0.9010(2) | 0.3211(2)  | 0.6244(2) | 0.0410(10)      |

|     |           |           |           |            |
|-----|-----------|-----------|-----------|------------|
| C40 | 1.0089(2) | 0.4118(2) | 0.6454(2) | 0.043(1)   |
| C41 | 1.0009(2) | 0.5188(2) | 0.6544(2) | 0.045(1)   |
| C42 | 0.8878(2) | 0.5355(2) | 0.6447(2) | 0.0376(9)  |
| F43 | 0.8388(2) | 0.9047(1) | 0.9489(1) | 0.0547(7)  |
| F44 | 0.8986(1) | 0.9567(1) | 0.8293(1) | 0.0576(7)  |
| O45 | 0.6011(2) | 1.2445(1) | 1.0175(1) | 0.0413(7)  |
| C46 | 0.6013(2) | 1.3595(2) | 1.0840(2) | 0.0389(9)  |
| C47 | 0.4706(2) | 1.3600(2) | 1.0667(2) | 0.0393(9)  |
| C48 | 0.4612(2) | 1.4827(2) | 1.1232(2) | 0.0388(9)  |
| C49 | 0.3298(2) | 1.4847(2) | 1.1066(2) | 0.043(1)   |
| C50 | 0.3194(3) | 1.6071(2) | 1.1520(2) | 0.045(1)   |
| C51 | 0.1879(3) | 1.6065(3) | 1.1300(2) | 0.058(1)   |
| C52 | 0.3463(2) | 0.8443(2) | 0.7510(2) | 0.0307(8)  |
| C53 | 0.3096(2) | 0.9219(2) | 0.8302(2) | 0.0355(9)  |
| C54 | 0.1907(2) | 0.9276(2) | 0.8168(2) | 0.0395(10) |
| C55 | 0.1063(2) | 0.8573(2) | 0.7260(2) | 0.0392(10) |
| C56 | 0.1432(2) | 0.7830(2) | 0.6463(2) | 0.0376(9)  |
| C57 | 0.2618(2) | 0.7771(2) | 0.6584(2) | 0.0327(8)  |
| C58 | 0.5016(2) | 0.7323(2) | 0.7185(2) | 0.0311(8)  |

### Anisotropic displacement parameters

| Atom | $U_{11}$   | $U_{22}$   | $U_{33}$   | $U_{12}$   | $U_{13}$   | $U_{23}$  |
|------|------------|------------|------------|------------|------------|-----------|
| C1   | 0.029(1)   | 0.033(1)   | 0.034(1)   | 0.0136(8)  | 0.0088(8)  | 0.0112(8) |
| C2   | 0.030(1)   | 0.0300(10) | 0.0296(10) | 0.0136(8)  | 0.0090(8)  | 0.0107(8) |
| N3   | 0.0291(9)  | 0.0299(9)  | 0.0353(9)  | 0.0137(7)  | 0.0098(7)  | 0.0111(7) |
| B4   | 0.031(1)   | 0.036(1)   | 0.036(1)   | 0.0152(10) | 0.0113(10) | 0.016(1)  |
| N5   | 0.0306(9)  | 0.0346(9)  | 0.0383(10) | 0.0117(7)  | 0.0078(8)  | 0.0147(8) |
| C6   | 0.029(1)   | 0.040(1)   | 0.054(1)   | 0.0109(9)  | 0.005(1)   | 0.014(1)  |
| C7   | 0.035(1)   | 0.043(1)   | 0.056(2)   | 0.007(1)   | 0.001(1)   | 0.012(1)  |
| C8   | 0.038(1)   | 0.036(1)   | 0.047(1)   | 0.0106(10) | 0.008(1)   | 0.010(1)  |
| C9   | 0.037(1)   | 0.035(1)   | 0.037(1)   | 0.0147(9)  | 0.0110(9)  | 0.0133(9) |
| C10  | 0.030(1)   | 0.032(1)   | 0.034(1)   | 0.0109(8)  | 0.0087(8)  | 0.0134(9) |
| N11  | 0.0304(9)  | 0.0293(8)  | 0.0344(9)  | 0.0123(7)  | 0.0111(7)  | 0.0116(7) |
| C12  | 0.0284(10) | 0.034(1)   | 0.032(1)   | 0.0154(8)  | 0.0115(8)  | 0.0147(8) |
| C13  | 0.029(1)   | 0.0318(10) | 0.031(1)   | 0.0127(8)  | 0.0097(8)  | 0.0126(8) |
| C14  | 0.0280(10) | 0.033(1)   | 0.033(1)   | 0.0151(8)  | 0.0104(8)  | 0.0133(8) |
| C15  | 0.029(1)   | 0.034(1)   | 0.034(1)   | 0.0150(8)  | 0.0092(8)  | 0.0117(9) |
| C16  | 0.031(1)   | 0.0299(10) | 0.030(1)   | 0.0119(8)  | 0.0070(8)  | 0.0094(8) |
| N17  | 0.0326(9)  | 0.0300(9)  | 0.0333(9)  | 0.0145(7)  | 0.0068(7)  | 0.0078(7) |

|     |           |            |            |            |            |            |
|-----|-----------|------------|------------|------------|------------|------------|
| B18 | 0.032(1)  | 0.040(1)   | 0.040(1)   | 0.019(1)   | 0.007(1)   | 0.008(1)   |
| N19 | 0.0328(9) | 0.0354(9)  | 0.0357(10) | 0.0141(8)  | 0.0073(8)  | 0.0130(8)  |
| C20 | 0.032(1)  | 0.042(1)   | 0.044(1)   | 0.0138(10) | 0.0043(10) | 0.012(1)   |
| C21 | 0.036(1)  | 0.040(1)   | 0.046(1)   | 0.0109(10) | 0.001(1)   | 0.010(1)   |
| C22 | 0.043(1)  | 0.035(1)   | 0.040(1)   | 0.0157(10) | 0.005(1)   | 0.0079(10) |
| C23 | 0.035(1)  | 0.036(1)   | 0.038(1)   | 0.0178(9)  | 0.0083(9)  | 0.0124(9)  |
| C24 | 0.031(1)  | 0.032(1)   | 0.036(1)   | 0.0140(8)  | 0.0070(9)  | 0.0116(9)  |
| N25 | 0.0322(9) | 0.0322(9)  | 0.0349(9)  | 0.0152(7)  | 0.0069(7)  | 0.0104(7)  |
| C26 | 0.032(1)  | 0.034(1)   | 0.032(1)   | 0.0168(9)  | 0.0091(8)  | 0.0125(9)  |
| C27 | 0.032(1)  | 0.0322(10) | 0.0303(10) | 0.0137(8)  | 0.0095(8)  | 0.0129(8)  |
| F28 | 0.0424(8) | 0.0473(7)  | 0.0463(8)  | 0.0185(6)  | 0.0236(6)  | 0.0222(6)  |
| F29 | 0.0325(7) | 0.0435(7)  | 0.0549(8)  | 0.0180(6)  | 0.0075(6)  | 0.0231(6)  |
| O30 | 0.0351(8) | 0.0301(7)  | 0.0482(9)  | 0.0131(6)  | 0.0128(7)  | 0.0082(7)  |
| C31 | 0.046(1)  | 0.026(1)   | 0.043(1)   | 0.0151(9)  | 0.012(1)   | 0.0085(9)  |
| C32 | 0.041(1)  | 0.033(1)   | 0.040(1)   | 0.0161(9)  | 0.0121(10) | 0.0133(9)  |
| C33 | 0.047(1)  | 0.042(1)   | 0.046(1)   | 0.024(1)   | 0.012(1)   | 0.011(1)   |
| C34 | 0.046(1)  | 0.042(1)   | 0.052(1)   | 0.022(1)   | 0.019(1)   | 0.019(1)   |
| C35 | 0.057(2)  | 0.072(2)   | 0.065(2)   | 0.035(2)   | 0.008(1)   | -0.005(2)  |
| C36 | 0.056(2)  | 0.079(2)   | 0.053(2)   | 0.035(2)   | 0.014(1)   | 0.011(1)   |
| C37 | 0.031(1)  | 0.033(1)   | 0.031(1)   | 0.0151(8)  | 0.0092(8)  | 0.0104(8)  |
| C38 | 0.034(1)  | 0.034(1)   | 0.040(1)   | 0.0151(9)  | 0.0099(9)  | 0.0137(9)  |
| C39 | 0.038(1)  | 0.041(1)   | 0.046(1)   | 0.021(1)   | 0.011(1)   | 0.016(1)   |
| C40 | 0.034(1)  | 0.054(1)   | 0.050(1)   | 0.025(1)   | 0.014(1)   | 0.023(1)   |
| C41 | 0.030(1)  | 0.047(1)   | 0.063(2)   | 0.015(1)   | 0.014(1)   | 0.026(1)   |
| C42 | 0.031(1)  | 0.036(1)   | 0.046(1)   | 0.0135(9)  | 0.0104(9)  | 0.0167(10) |
| F43 | 0.0577(9) | 0.0442(8)  | 0.0540(9)  | 0.0259(7)  | -0.0077(7) | 0.0123(7)  |
| F44 | 0.0350(8) | 0.0560(9)  | 0.0573(9)  | 0.0145(7)  | 0.0179(7)  | 0.0001(7)  |
| O45 | 0.0373(9) | 0.0319(8)  | 0.0462(9)  | 0.0164(7)  | 0.0083(7)  | 0.0060(7)  |
| C46 | 0.044(1)  | 0.032(1)   | 0.037(1)   | 0.0176(10) | 0.0109(10) | 0.0090(9)  |
| C47 | 0.040(1)  | 0.034(1)   | 0.041(1)   | 0.0164(9)  | 0.0113(10) | 0.0116(9)  |
| C48 | 0.042(1)  | 0.034(1)   | 0.039(1)   | 0.0177(10) | 0.0123(10) | 0.0119(9)  |
| C49 | 0.043(1)  | 0.042(1)   | 0.042(1)   | 0.020(1)   | 0.010(1)   | 0.013(1)   |
| C50 | 0.051(1)  | 0.043(1)   | 0.046(1)   | 0.026(1)   | 0.019(1)   | 0.015(1)   |
| C51 | 0.061(2)  | 0.064(2)   | 0.058(2)   | 0.040(1)   | 0.019(1)   | 0.021(1)   |
| C52 | 0.030(1)  | 0.0304(10) | 0.035(1)   | 0.0140(8)  | 0.0119(8)  | 0.0145(8)  |
| C53 | 0.038(1)  | 0.038(1)   | 0.034(1)   | 0.0195(9)  | 0.0134(9)  | 0.0138(9)  |
| C54 | 0.040(1)  | 0.043(1)   | 0.046(1)   | 0.024(1)   | 0.022(1)   | 0.021(1)   |
| C55 | 0.032(1)  | 0.048(1)   | 0.048(1)   | 0.0192(10) | 0.0166(10) | 0.025(1)   |
| C56 | 0.033(1)  | 0.040(1)   | 0.041(1)   | 0.0146(9)  | 0.0085(9)  | 0.0170(10) |
| C57 | 0.033(1)  | 0.032(1)   | 0.035(1)   | 0.0139(8)  | 0.0105(9)  | 0.0134(9)  |
| C58 | 0.030(1)  | 0.035(1)   | 0.033(1)   | 0.0164(9)  | 0.0114(8)  | 0.0159(9)  |

Final coordinates and isotropic displacement parameters ( $\text{\AA}^2$ ) for H- atoms

| Atom | X       | Y        | Z       | $U_{\text{iso}}$ |
|------|---------|----------|---------|------------------|
| H1   | 0.34266 | 0.58819  | 0.63204 | 0.0385           |
| H6   | 0.12194 | 0.14591  | 0.43386 | 0.052            |
| H7   | 0.10268 | -0.04643 | 0.33562 | 0.060            |
| H8   | 0.28095 | -0.10280 | 0.31480 | 0.053            |
| H15  | 0.78420 | 0.70941  | 0.74885 | 0.0390           |
| H20  | 0.99076 | 1.13522  | 1.00799 | 0.049            |
| H21  | 1.00570 | 1.32385  | 1.11739 | 0.054            |
| H22  | 0.82793 | 1.38077  | 1.12533 | 0.050            |
| H31A | 0.47488 | -0.09370 | 0.26806 | 0.048            |
| H31B | 0.46927 | -0.13367 | 0.35643 | 0.048            |
| H32A | 0.68254 | -0.06015 | 0.41062 | 0.046            |
| H32B | 0.69616 | 0.00524  | 0.34011 | 0.046            |
| H33A | 0.61839 | -0.24471 | 0.26904 | 0.056            |
| H33B | 0.62397 | -0.18241 | 0.19644 | 0.056            |
| H34A | 0.83356 | -0.16997 | 0.32409 | 0.054            |
| H34B | 0.84385 | -0.09487 | 0.26155 | 0.054            |
| H35A | 0.76044 | -0.34579 | 0.17483 | 0.089            |
| H35B | 0.76314 | -0.27350 | 0.11065 | 0.089            |
| H36A | 0.93100 | -0.34201 | 0.10329 | 0.099            |
| H36B | 0.97741 | -0.27220 | 0.22245 | 0.099            |
| H36C | 0.97936 | -0.20138 | 0.15675 | 0.099            |
| H38  | 0.71335 | 0.27427  | 0.60294 | 0.043            |
| H39  | 0.90535 | 0.24653  | 0.61547 | 0.049            |
| H40  | 1.08730 | 0.40103  | 0.65349 | 0.052            |
| H41  | 1.07441 | 0.58128  | 0.66755 | 0.054            |
| H42  | 0.88422 | 0.60908  | 0.65012 | 0.045            |
| H46A | 0.65682 | 1.41999  | 1.06970 | 0.047            |
| H46B | 0.63085 | 1.37650  | 1.15439 | 0.047            |
| H47A | 0.41828 | 1.30561  | 1.08872 | 0.047            |
| H47B | 0.43823 | 1.33099  | 0.99423 | 0.047            |
| H48A | 0.49381 | 1.51154  | 1.19570 | 0.047            |
| H48B | 0.51376 | 1.53692  | 1.10126 | 0.047            |
| H49A | 0.27977 | 1.43754  | 1.13572 | 0.051            |
| H49B | 0.29404 | 1.44678  | 1.03376 | 0.051            |
| H50A | 0.35108 | 1.64389  | 1.22535 | 0.054            |
| H50B | 0.37215 | 1.65567  | 1.12525 | 0.054            |
| H51A | 0.15517 | 1.56837  | 1.05745 | 0.088            |
| H51B | 0.18676 | 1.68755  | 1.15796 | 0.088            |
| H51C | 0.13634 | 1.56331  | 1.16040 | 0.088            |
| H53  | 0.36633 | 0.97052  | 0.89296 | 0.043            |

|     |         |         |         |        |
|-----|---------|---------|---------|--------|
| H54 | 0.16674 | 0.98044 | 0.87081 | 0.047  |
| H55 | 0.02407 | 0.85988 | 0.71829 | 0.047  |
| H56 | 0.08660 | 0.73606 | 0.58322 | 0.045  |
| H57 | 0.28636 | 0.72677 | 0.60314 | 0.0392 |

### Crystal data for *aza-BODIPY 9*

|                          |                                                                                                                                   |
|--------------------------|-----------------------------------------------------------------------------------------------------------------------------------|
| formula                  | C <sub>44</sub> H <sub>42</sub> B <sub>2</sub> F <sub>6</sub> N <sub>6</sub> O <sub>2</sub> , 2(CH <sub>2</sub> Cl <sub>2</sub> ) |
| molecular weight         | 992.31 gmol <sup>-1</sup>                                                                                                         |
| absorption               | $\mu = 2.908 \text{ mm}^{-1}$                                                                                                     |
| crystal size             | 0.08 x 0.25 x 0.6 mm <sup>3</sup> black needle                                                                                    |
| space group              | P 2 <sub>1</sub> /c (monoclinic)                                                                                                  |
| lattice parameters       | a = 4.7273(4) Å                                                                                                                   |
| (calculate from          | b = 19.7110(10) Å $\beta = 97.316(7)^\circ$                                                                                       |
| 27380 reflections with   | c = 25.181(2) Å                                                                                                                   |
| 1.8° < $\theta$ < 66.6°) | V = 2327.2(3) Å <sup>3</sup> z = 2    F(000) = 1024                                                                               |
| temperature              | -80°C                                                                                                                             |
| density                  | d <sub>xray</sub> = 1.416 gcm <sup>-3</sup>                                                                                       |

#### data collection

|                        |                                                                   |
|------------------------|-------------------------------------------------------------------|
| diffractometer         | STOE IPDS 2T                                                      |
| radiation              | Mo-K $\alpha$ Graphitmonochromator                                |
| Scan – type            | $\omega$ scans                                                    |
| Scan – width           | 1°                                                                |
| scan range             | 2° ≤ $\theta$ < 68°<br>-5 ≤ h ≤ 5    -23 ≤ k ≤ 23    -29 ≤ l ≤ 30 |
| number of reflections: |                                                                   |
| measured               | 29890                                                             |
| unique                 | 4141 (R <sub>int</sub> = 0.2707)                                  |
| observed               | 1828 ( I /σ(F) > 4.0)                                             |

#### daten correction, structure solution and refinement

|                                 |                                                                                                                                                                                                                                                                                                     |
|---------------------------------|-----------------------------------------------------------------------------------------------------------------------------------------------------------------------------------------------------------------------------------------------------------------------------------------------------|
| corrections                     | Lorentz and polarisation correction.                                                                                                                                                                                                                                                                |
| Structure solution              | Program: SIR-97 (Direct methods)                                                                                                                                                                                                                                                                    |
| refinement                      | Program: SHELXL-97 (full matrix). 337 refined parameters, weighting scheme:<br>$w = 1/[\sigma^2(F_o^2) + (0.2 * P)^2]$<br>with $(\text{Max}(F_o^2, 0) + 2 * F_c^2) / 3$ . H-atoms at calculated positions and refined with isotropic displacement parameters, non H- atoms refined anisotropically. |
| R-values                        | wR2 = 0.479 (R1 = 0.1847 for observed reflections, 0.2451 for all reflections)                                                                                                                                                                                                                      |
| goodness of fit                 | S = 1.445                                                                                                                                                                                                                                                                                           |
| maximum deviation of parameters | 0.001 * e.s.d                                                                                                                                                                                                                                                                                       |
| maximum peak height in          |                                                                                                                                                                                                                                                                                                     |
| diff. Fourier synthesis         | 0.62, -0.57 eÅ <sup>-3</sup>                                                                                                                                                                                                                                                                        |
| remark                          | molecule has C <sub>i</sub> symmetry                                                                                                                                                                                                                                                                |

Final coordinates and equivalent displacement parameters ( $\text{\AA}^2$ )

$$U_{\text{eq}} = (1/3) * \sum \sum_{ij} a_i^* a_j^* \mathbf{a}_i \mathbf{a}_j$$

| Atom | X         | Y         | Z          | $U_{\text{eq}}$ |
|------|-----------|-----------|------------|-----------------|
| N1   | -0.060(2) | 0.6607(4) | 0.5721(3)  | 0.072(3)        |
| C2   | 0.092(2)  | 0.6155(5) | 0.5509(3)  | 0.065(3)        |
| C3   | 0.115(2)  | 0.6071(5) | 0.4932(4)  | 0.074(4)        |
| C4   | 0.303(2)  | 0.5535(5) | 0.4896(3)  | 0.066(3)        |
| C5   | 0.403(2)  | 0.5301(5) | 0.5431(4)  | 0.064(3)        |
| N6   | 0.270(2)  | 0.5695(4) | 0.5798(3)  | 0.072(3)        |
| B7   | 0.300(2)  | 0.5631(6) | 0.6406(5)  | 0.068(4)        |
| N8   | 0.137(2)  | 0.6267(4) | 0.6599(3)  | 0.071(3)        |
| C8   | 0.591(2)  | 0.4792(5) | 0.5547(4)  | 0.072(3)        |
| C9   | 0.156(2)  | 0.6350(6) | 0.7156(4)  | 0.080(4)        |
| C10  | 0.003(2)  | 0.6838(5) | 0.7366(4)  | 0.080(4)        |
| C11  | -0.189(2) | 0.7236(6) | 0.7028(4)  | 0.081(4)        |
| C12  | -0.205(2) | 0.7163(5) | 0.6494(4)  | 0.071(3)        |
| C13  | -0.043(2) | 0.6653(5) | 0.6271(3)  | 0.068(3)        |
| C14  | -0.032(2) | 0.6501(5) | 0.4518(4)  | 0.073(4)        |
| C17  | -0.303(3) | 0.7339(7) | 0.3714(5)  | 0.098(5)        |
| C15A | -0.12(1)  | 0.717(1)  | 0.464(1)   | 0.10(1)         |
| C16A | -0.242(8) | 0.760(2)  | 0.421(1)   | 0.10(1)         |
| C19A | -0.213(7) | 0.669(1)  | 0.359(1)   | 0.078(10)       |
| C20A | -0.095(6) | 0.627(1)  | 0.3995(9)  | 0.071(8)        |
| C15B | -0.284(6) | 0.687(2)  | 0.4590(10) | 0.079(9)        |
| C16B | -0.404(8) | 0.731(1)  | 0.420(1)   | 0.09(1)         |
| C18B | -0.09(1)  | 0.701(2)  | 0.362(1)   | 0.13(2)         |
| C19B | 0.070(9)  | 0.657(2)  | 0.4028(9)  | 0.10(1)         |
| F20  | -0.429(2) | 0.7739(5) | 0.3319(3)  | 0.127(4)        |
| F21  | 0.176(1)  | 0.5041(3) | 0.6573(2)  | 0.080(2)        |
| F22  | 0.582(1)  | 0.5651(3) | 0.6636(2)  | 0.079(2)        |
| O23  | -0.385(2) | 0.7512(3) | 0.6117(3)  | 0.077(2)        |
| C24  | -0.546(2) | 0.8061(5) | 0.6318(5)  | 0.083(4)        |
| C25  | -0.741(3) | 0.8335(6) | 0.5844(5)  | 0.100(5)        |
| C26  | -0.579(3) | 0.8656(7) | 0.5413(6)  | 0.111(6)        |
| C27  | -0.796(3) | 0.8904(8) | 0.4928(6)  | 0.124(7)        |
| C28  | -0.657(3) | 0.9212(9) | 0.4489(7)  | 0.135(7)        |
| C29  | -0.870(5) | 0.943(2)  | 0.4015(8)  | 0.21(1)         |
| C1L  | 0.254(5)  | 0.953(1)  | 0.7546(8)  | 0.18(1)         |
| CL2L | 0.165(2)  | 0.8719(3) | 0.7441(3)  | 0.220(4)        |
| CL3L | 0.403(2)  | 0.9898(3) | 0.7043(2)  | 0.182(3)        |



### Anisotropic displacement parameters

| Atom | $U_{11}$  | $U_{22}$ | $U_{33}$ | $U_{12}$  | $U_{13}$ | $U_{23}$  |
|------|-----------|----------|----------|-----------|----------|-----------|
| N1   | 0.079(6)  | 0.078(5) | 0.061(4) | 0.004(4)  | 0.017(4) | -0.006(3) |
| C2   | 0.062(6)  | 0.076(5) | 0.056(4) | -0.001(4) | 0.003(4) | 0.003(4)  |
| C3   | 0.087(7)  | 0.078(6) | 0.061(5) | 0.010(5)  | 0.020(5) | 0.000(4)  |
| C4   | 0.064(6)  | 0.074(5) | 0.063(5) | -0.001(4) | 0.014(4) | 0.000(4)  |
| C5   | 0.056(6)  | 0.073(5) | 0.065(5) | 0.002(4)  | 0.012(4) | -0.001(4) |
| N6   | 0.081(6)  | 0.076(4) | 0.062(4) | 0.012(4)  | 0.022(4) | 0.002(3)  |
| B7   | 0.050(7)  | 0.074(6) | 0.077(6) | 0.001(5)  | 0.000(5) | 0.002(5)  |
| N8   | 0.071(5)  | 0.087(5) | 0.057(4) | -0.003(4) | 0.014(4) | -0.002(4) |
| C8   | 0.081(7)  | 0.080(6) | 0.058(4) | 0.004(5)  | 0.021(5) | 0.005(4)  |
| C9   | 0.085(8)  | 0.101(7) | 0.052(5) | -0.008(6) | 0.003(5) | -0.006(4) |
| C10  | 0.084(7)  | 0.092(7) | 0.066(5) | 0.007(6)  | 0.018(5) | -0.015(5) |
| C11  | 0.083(8)  | 0.091(6) | 0.069(6) | 0.013(6)  | 0.009(5) | -0.005(5) |
| C12  | 0.067(6)  | 0.079(5) | 0.069(5) | -0.001(5) | 0.016(5) | -0.005(4) |
| C13  | 0.066(6)  | 0.082(6) | 0.056(5) | 0.005(5)  | 0.011(4) | -0.002(4) |
| C14  | 0.077(7)  | 0.081(6) | 0.061(5) | 0.003(5)  | 0.004(5) | -0.014(4) |
| C17  | 0.12(1)   | 0.098(8) | 0.075(7) | 0.020(8)  | 0.020(7) | 0.022(6)  |
| C15A | 0.16(4)   | 0.07(2)  | 0.07(1)  | 0.03(2)   | -0.02(2) | -0.01(1)  |
| C16A | 0.10(2)   | 0.09(2)  | 0.10(2)  | 0.00(2)   | -0.03(2) | -0.01(2)  |
| C19A | 0.09(2)   | 0.07(2)  | 0.07(1)  | 0.01(1)   | 0.02(1)  | 0.01(1)   |
| C20A | 0.06(2)   | 0.09(1)  | 0.07(1)  | -0.01(1)  | 0.01(1)  | -0.01(1)  |
| C15B | 0.06(2)   | 0.10(2)  | 0.07(1)  | 0.01(1)   | 0.02(1)  | 0.01(1)   |
| C16B | 0.11(2)   | 0.08(2)  | 0.08(1)  | 0.02(2)   | 0.03(2)  | 0.01(1)   |
| C18B | 0.20(5)   | 0.13(3)  | 0.08(2)  | 0.05(3)   | 0.07(2)  | 0.04(2)   |
| C19B | 0.12(3)   | 0.11(2)  | 0.06(1)  | 0.05(2)   | 0.04(2)  | 0.02(1)   |
| F20  | 0.143(7)  | 0.146(6) | 0.089(4) | 0.041(5)  | 0.006(4) | 0.032(4)  |
| F21  | 0.095(4)  | 0.075(3) | 0.074(3) | -0.002(3) | 0.024(3) | 0.010(2)  |
| F22  | 0.074(4)  | 0.096(4) | 0.068(3) | 0.003(3)  | 0.014(3) | -0.001(3) |
| O23  | 0.078(5)  | 0.082(4) | 0.073(4) | 0.015(3)  | 0.019(3) | -0.002(3) |
| C24  | 0.075(7)  | 0.081(6) | 0.093(7) | 0.013(5)  | 0.011(6) | -0.002(5) |
| C25  | 0.107(10) | 0.090(7) | 0.107(8) | 0.009(7)  | 0.033(8) | 0.007(6)  |
| C26  | 0.12(1)   | 0.100(8) | 0.117(9) | 0.018(8)  | 0.044(9) | 0.034(7)  |
| C27  | 0.11(1)   | 0.14(1)  | 0.12(1)  | 0.010(9)  | 0.012(9) | 0.047(9)  |
| C28  | 0.10(1)   | 0.17(1)  | 0.14(1)  | 0.000(10) | 0.018(9) | 0.05(1)   |
| C29  | 0.17(2)   | 0.34(3)  | 0.14(2)  | 0.01(2)   | 0.04(1)  | 0.14(2)   |
| C1L  | 0.19(2)   | 0.20(2)  | 0.18(2)  | -0.08(2)  | 0.12(2)  | -0.08(1)  |
| CL2L | 0.297(8)  | 0.203(5) | 0.190(5) | -0.123(6) | 0.145(6) | -0.093(4) |
| CL3L | 0.256(7)  | 0.180(5) | 0.113(3) | -0.055(5) | 0.032(4) | -0.008(3) |

Final coordinates and isotropic displacement parameters ( $\text{\AA}^2$ ) for H- atoms

| Atom | X        | Y       | Z       | $U_{\text{iso}}$ |
|------|----------|---------|---------|------------------|
| H8   | 0.65116  | 0.46576 | 0.59059 | 0.086            |
| H9   | 0.27617  | 0.60611 | 0.73868 | 0.096            |
| H10  | 0.02612  | 0.69117 | 0.77416 | 0.096            |
| H11  | -0.30692 | 0.75560 | 0.71766 | 0.098            |
| H15A | -0.09956 | 0.73286 | 0.50022 | 0.12             |
| H16A | -0.27928 | 0.80647 | 0.42752 | 0.12             |
| H19A | -0.23341 | 0.65344 | 0.32316 | 0.09             |
| H20A | -0.05548 | 0.58140 | 0.39147 | 0.086            |
| H15B | -0.36998 | 0.68024 | 0.49075 | 0.09             |
| H16B | -0.55657 | 0.75944 | 0.42735 | 0.11             |
| H18B | -0.02289 | 0.70502 | 0.32795 | 0.16             |
| H19B | 0.23790  | 0.63440 | 0.39582 | 0.12             |
| H24A | -0.41542 | 0.84205 | 0.64772 | 0.099            |
| H24B | -0.65857 | 0.78911 | 0.65955 | 0.099            |
| H25A | -0.86810 | 0.86799 | 0.59723 | 0.120            |
| H25B | -0.86131 | 0.79607 | 0.56803 | 0.120            |
| H26A | -0.44709 | 0.83186 | 0.52880 | 0.133            |
| H26B | -0.46423 | 0.90453 | 0.55683 | 0.133            |
| H27A | -0.91264 | 0.85131 | 0.47842 | 0.149            |
| H27B | -0.92548 | 0.92419 | 0.50588 | 0.149            |
| H28A | -0.52309 | 0.88786 | 0.43643 | 0.162            |
| H28B | -0.54468 | 0.96113 | 0.46294 | 0.162            |
| H29A | -0.96779 | 0.90302 | 0.38503 | 0.32             |
| H29B | -0.76892 | 0.96629 | 0.37513 | 0.32             |
| H29C | -1.01011 | 0.97395 | 0.41393 | 0.32             |
| H1L1 | 0.38891  | 0.95591 | 0.78790 | 0.22             |
| H1L2 | 0.08025  | 0.97851 | 0.76030 | 0.22             |
